# Supplementary material
Source: Springer Nature journal article supplement (https://www.springermedizin.de/resource/supplementary/12874_2005_104_MOESM1_ESM.pdf/9433774)

**Aberdeen *Children of the 1950s* study (n = 12,150)**

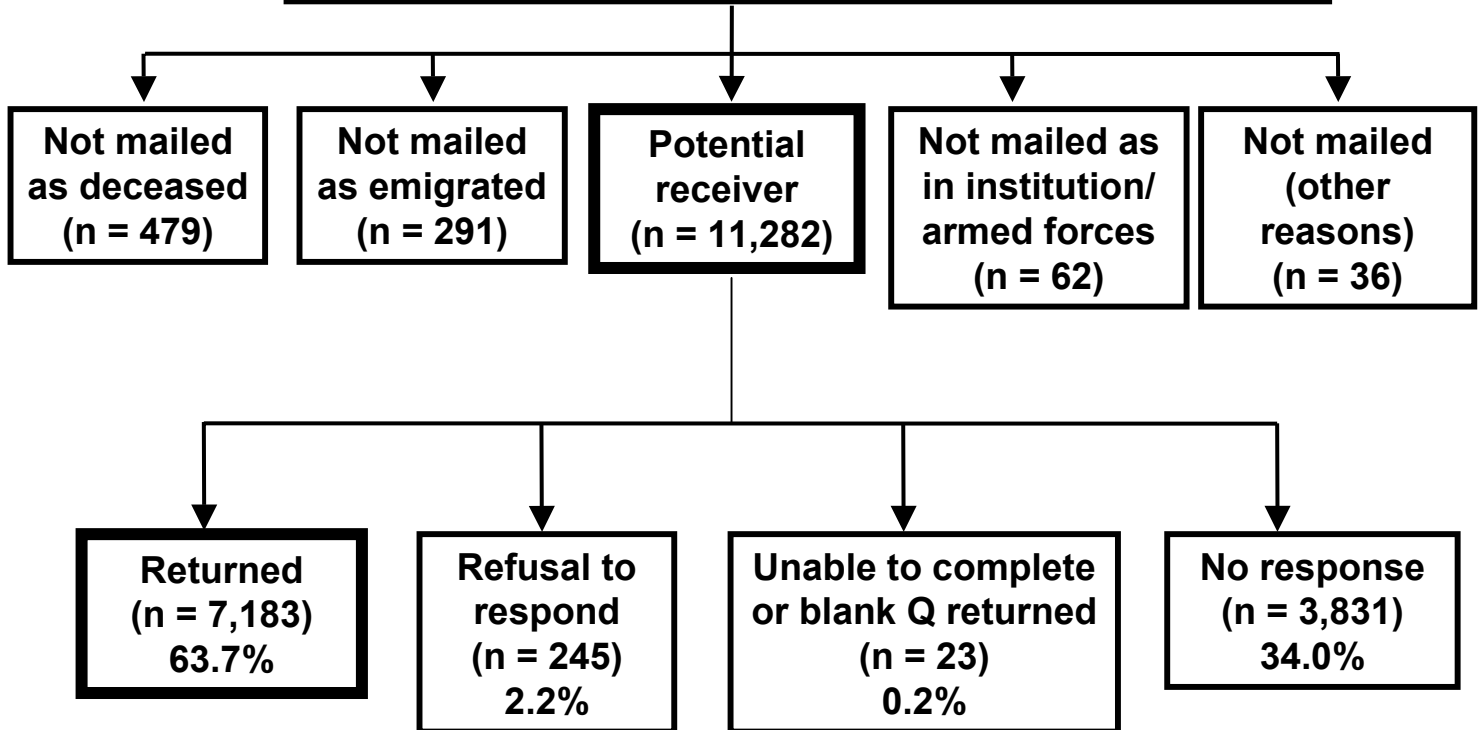

Supplement: MOESM1 [file 9433774]
